# Supplementary material for: Complex magnetic behaviour of Sr2CoNb1−xTixO6(0 ≤ x ≤ 0.5) as a result of a flexible microstructure
Source: Royal Society of Chemistry journal article supplement (doi:10.1039/c4dt03112a), 2015-01-01
Supplement: c4dt03112a1.pdf [file c4dt03112a1.pdf]

## SUPPLEMENTARY INFORMATION FOR

### Complex magnetic behaviour of $\text{Sr}_2\text{CoNb}_{1-x}\text{Ti}_x\text{O}_6$ ( $0 \leq x \leq 0.5$ ) as a result of a flexible microstructure

*M. Teresa Azcondo<sup>a,\*</sup>, Julio Romero de Paz<sup>b</sup>, Khalid Boulahya<sup>c</sup>, Clemens Ritter<sup>d</sup>, Flaviano García-Alvarado<sup>a</sup> and Ulises Amador<sup>a</sup>*

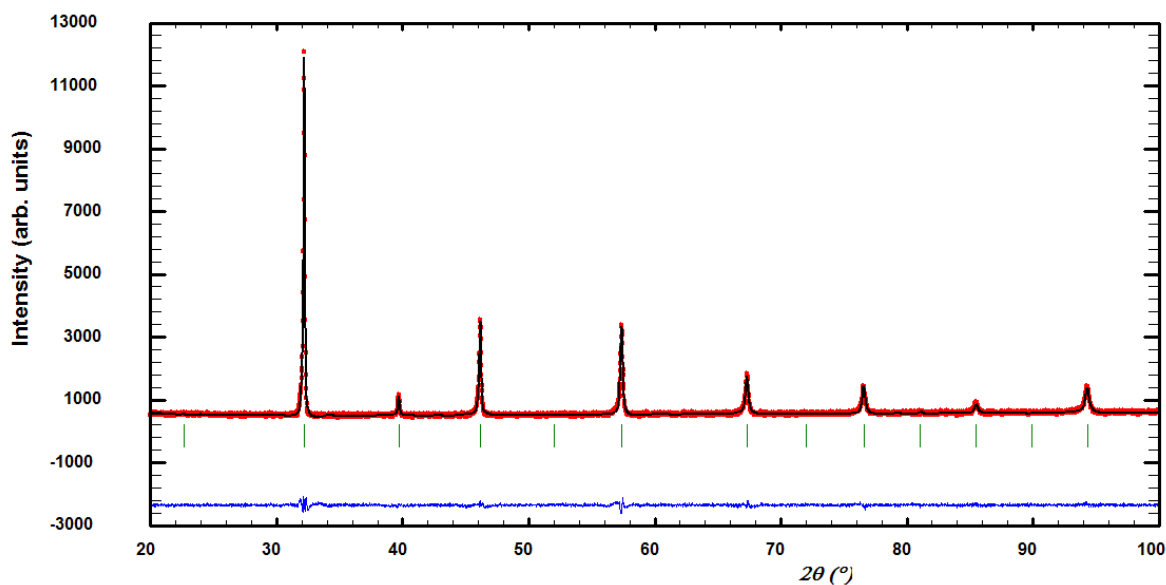

**Figure SI 1.** Experimental (red circles) and calculated (black continuous line) XRD patterns (and their difference, blue line at the bottom) for  $\text{Sr}_2\text{CoNbO}_6$ .

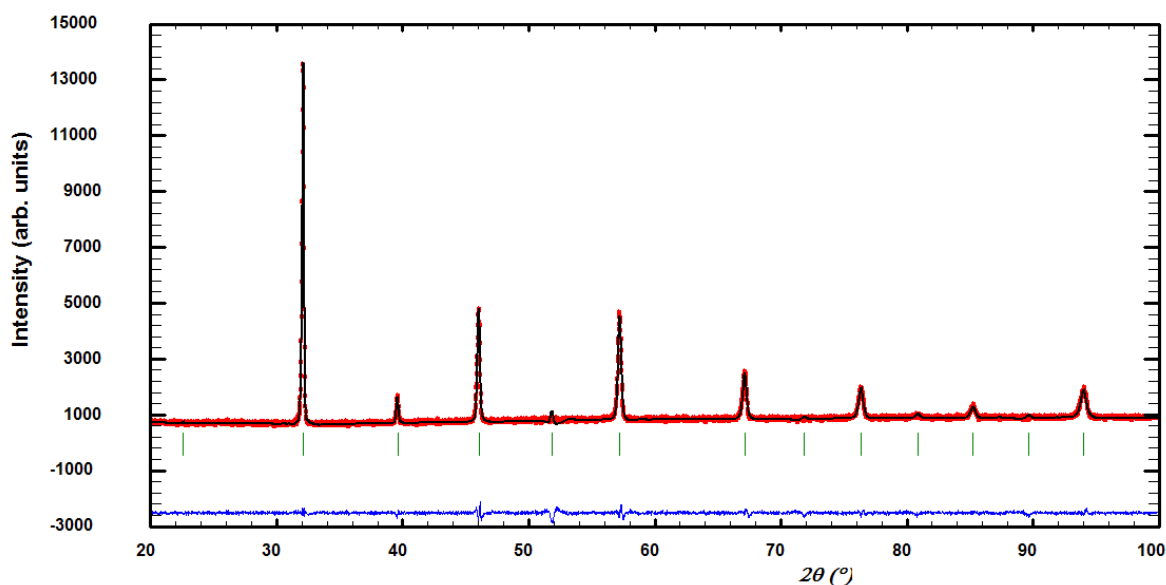

**Figure SI 2.** Experimental (red circles) and calculated (black continuous line) XRD patterns (and their difference, blue line at the bottom) for  $\text{Sr}_2\text{CoNb}_{0.90}\text{Ti}_{0.10}\text{O}_6$ .

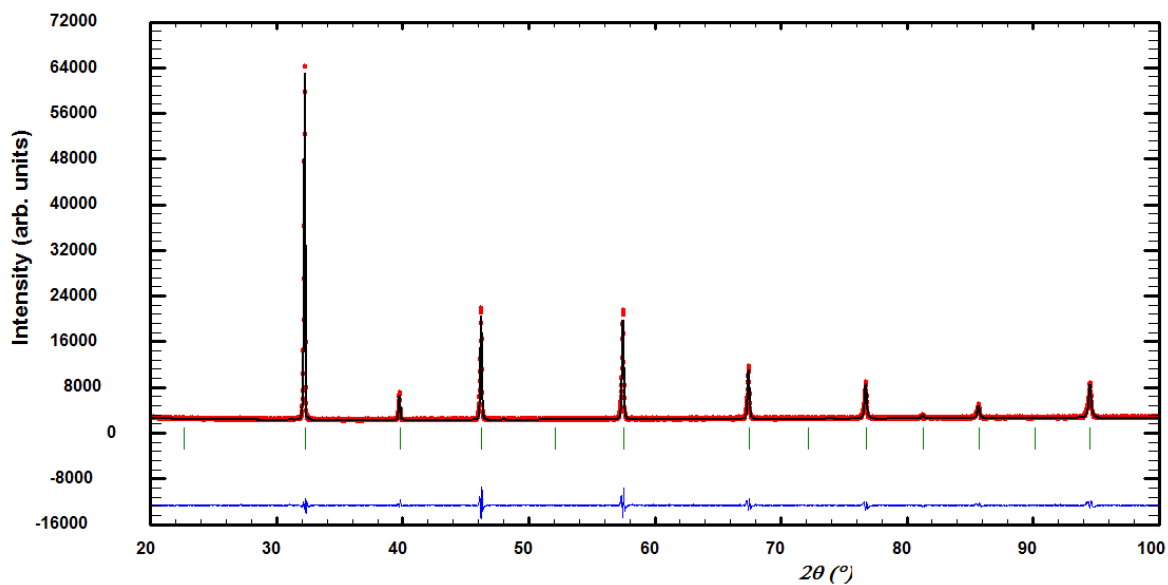

**Figure SI 3.** Experimental (red circles) and calculated (black continuous line) XRD patterns (and their difference, blue line at the bottom) for Sr<sub>2</sub>CoNb<sub>0.80</sub>Ti<sub>0.20</sub>O<sub>6</sub>.

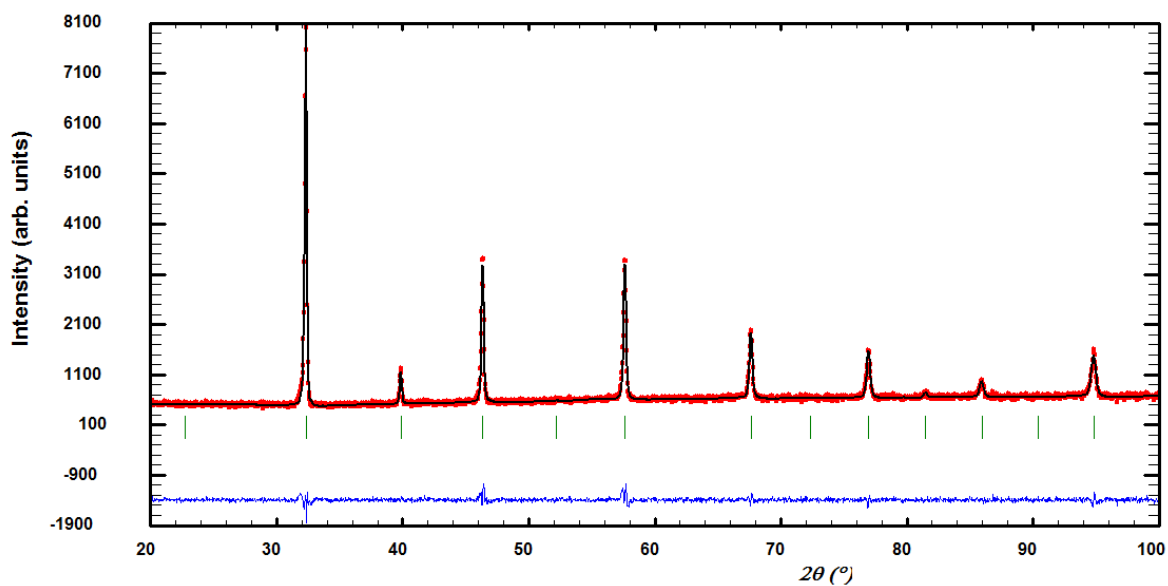

**Figure SI 4.** Experimental (red circles) and calculated (black continuous line) XRD patterns (and their difference, blue line at the bottom) for Sr<sub>2</sub>CoNb<sub>0.70</sub>Ti<sub>0.30</sub>O<sub>6</sub>.

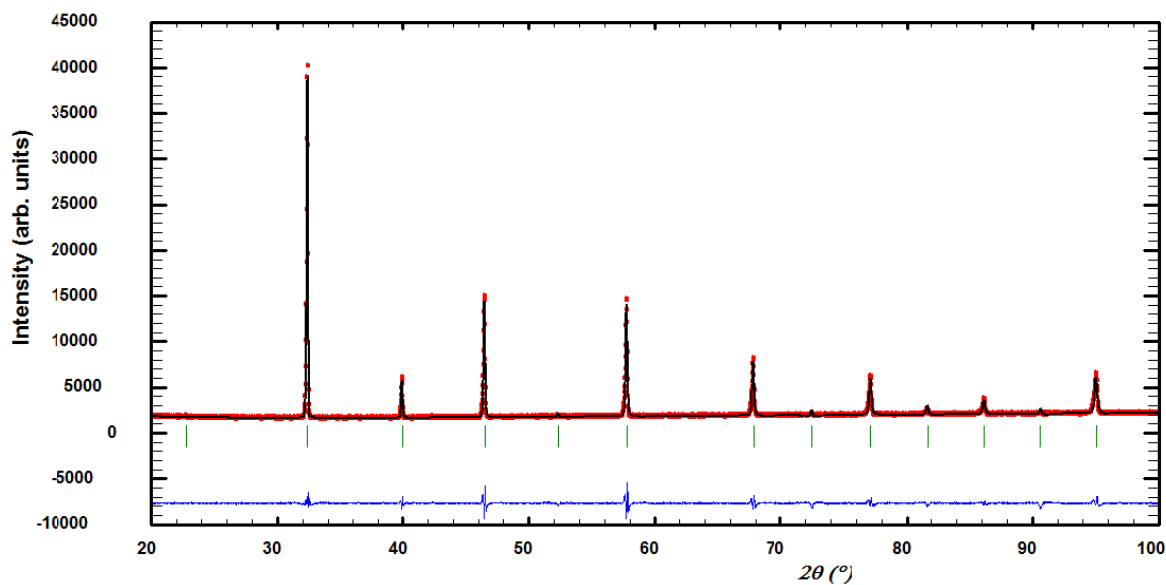

**Figure SI 5.** Experimental (red circles) and calculated (black continuous line) XRD patterns (and their difference, blue line at the bottom) for  $\text{Sr}_2\text{CoNb}_{0.50}\text{Ti}_{0.50}\text{O}_6$ .

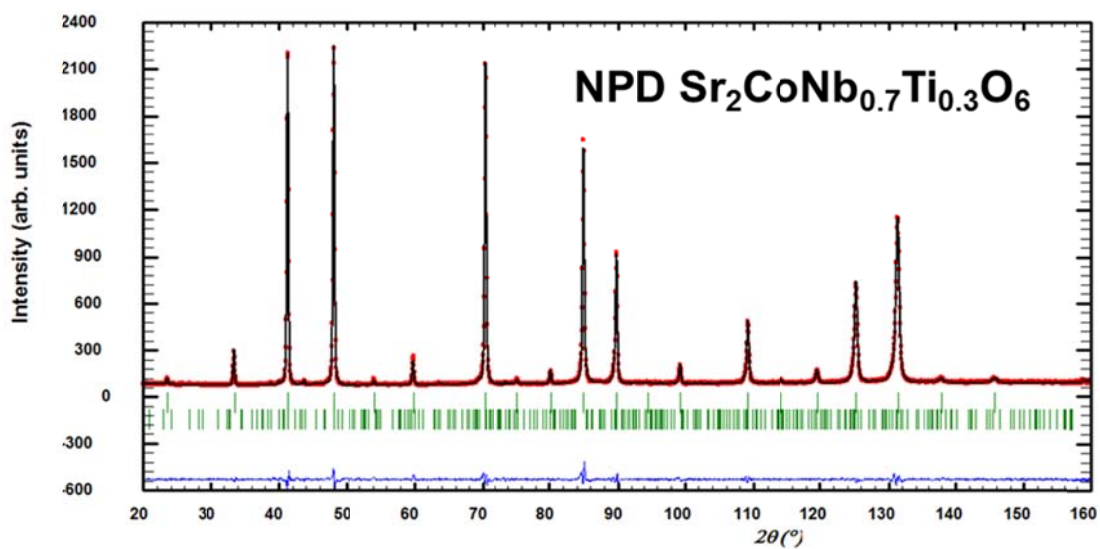

**Figure SI 6.** Experimental (red circles) and calculated (black continuous line) NPD patterns (and their difference, blue line at the bottom) for  $\text{Sr}_2\text{CoNb}_{0.7}\text{Ti}_{0.3}\text{O}_6$ . The first row of vertical bars indicates the positions of Bragg peaks for this material; the second row corresponds to a small amount (c.a. 1% weight) of  $\text{Sr}_7\text{Nb}_6\text{O}_{21}$ .

### HREM of $\text{Sr}_2\text{CoNb}_{1-x}\text{Ti}_x\text{O}_6$ with $x = 0.0$

HREM taken along different zone axes were obtained to fully reconstruct the reciprocal/real space. The most relevant reciprocal zone axes corresponding to [001], [111] are given as SI2 and SI3, respectively; whereas that along [1-10] is presented in the manuscript as Figure 2. For the parent non-substituted material, images along [001] and [111] zone axes show an apparently ordered material with d-spacing corresponding to a simple perovskite structure, FT (inset of Fig. SI2 and SI3) reveals that the whole crystals seem to be homogeneous and only maxima corresponding to the simple cubic perovskite were observed.

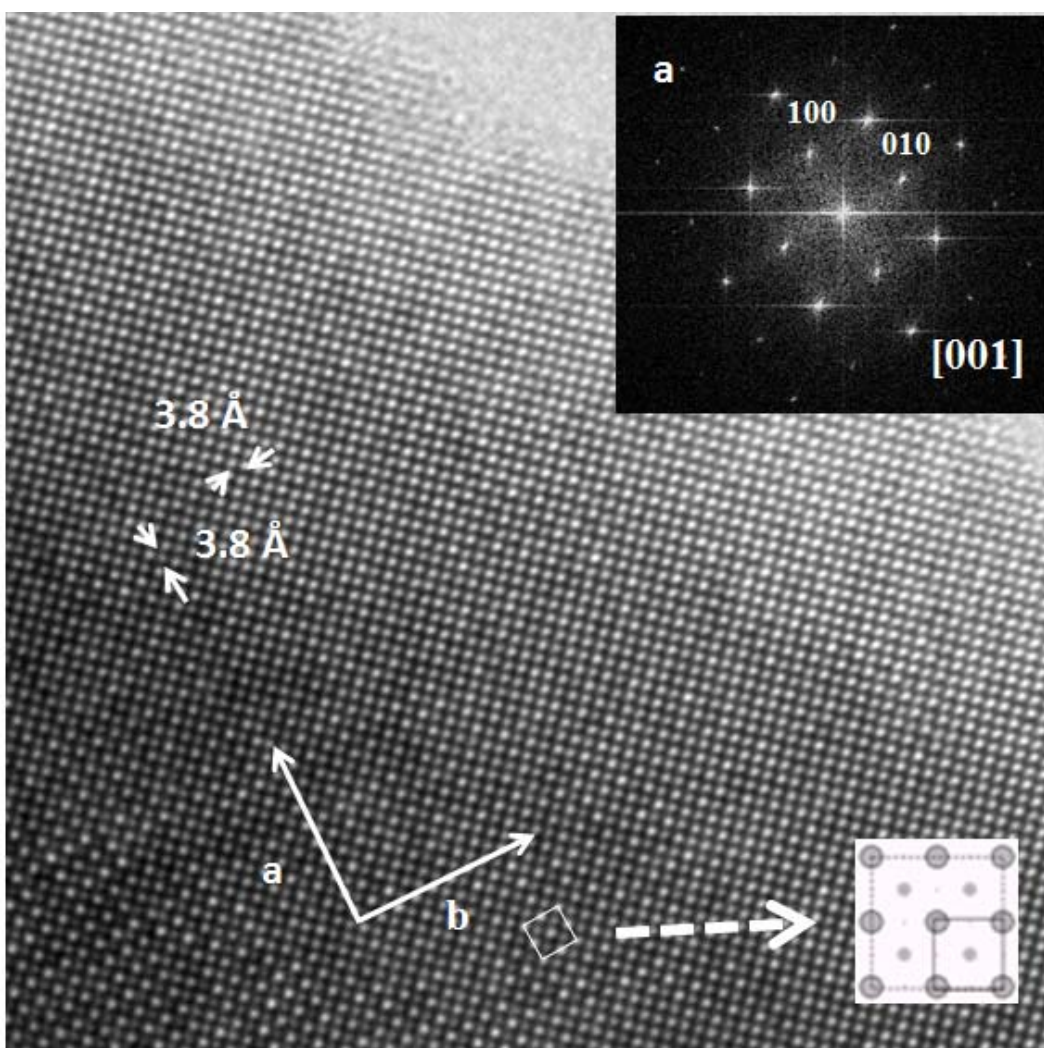

**Figure SI 7.** HREM image of  $\text{Sr}_2\text{CoNbO}_6$  along [001]p. (a) Optical FT.

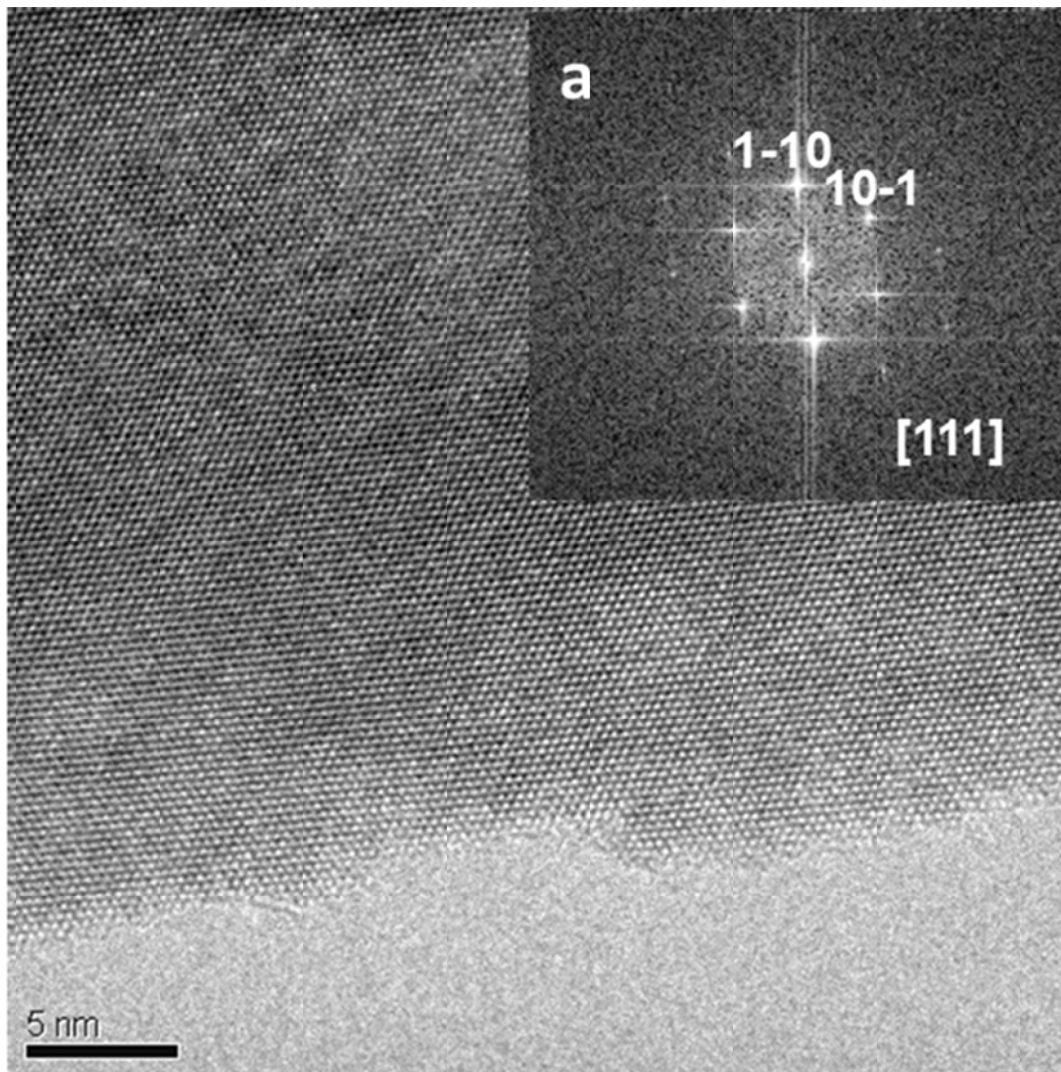

**Figure SI 8.** HREM image of Sr<sub>2</sub>CoNbO<sub>6</sub> along [111]<sub>p</sub>. (a) Optical FT.

### HREM of $\text{Sr}_2\text{CoNb}_{1-x}\text{Ti}_x\text{O}_6$ with $x = 0.1$

HREM taken along different zone axes were obtained to fully reconstruct the reciprocal/real space. The most relevant reciprocal zone axes corresponding to [001], [111] and [-110] are given as SI4, SI5 and SI6, respectively. As for the parent non-substituted material, Images along [001] and [111] zone axes show an apparently ordered material with d-spacing corresponding to a simple perovskite structure, FFT (inset of Fig. SI4 and SI5) reveals that the whole crystals seem to be homogeneous and only maxima corresponding to the simple cubic perovskite were observed.

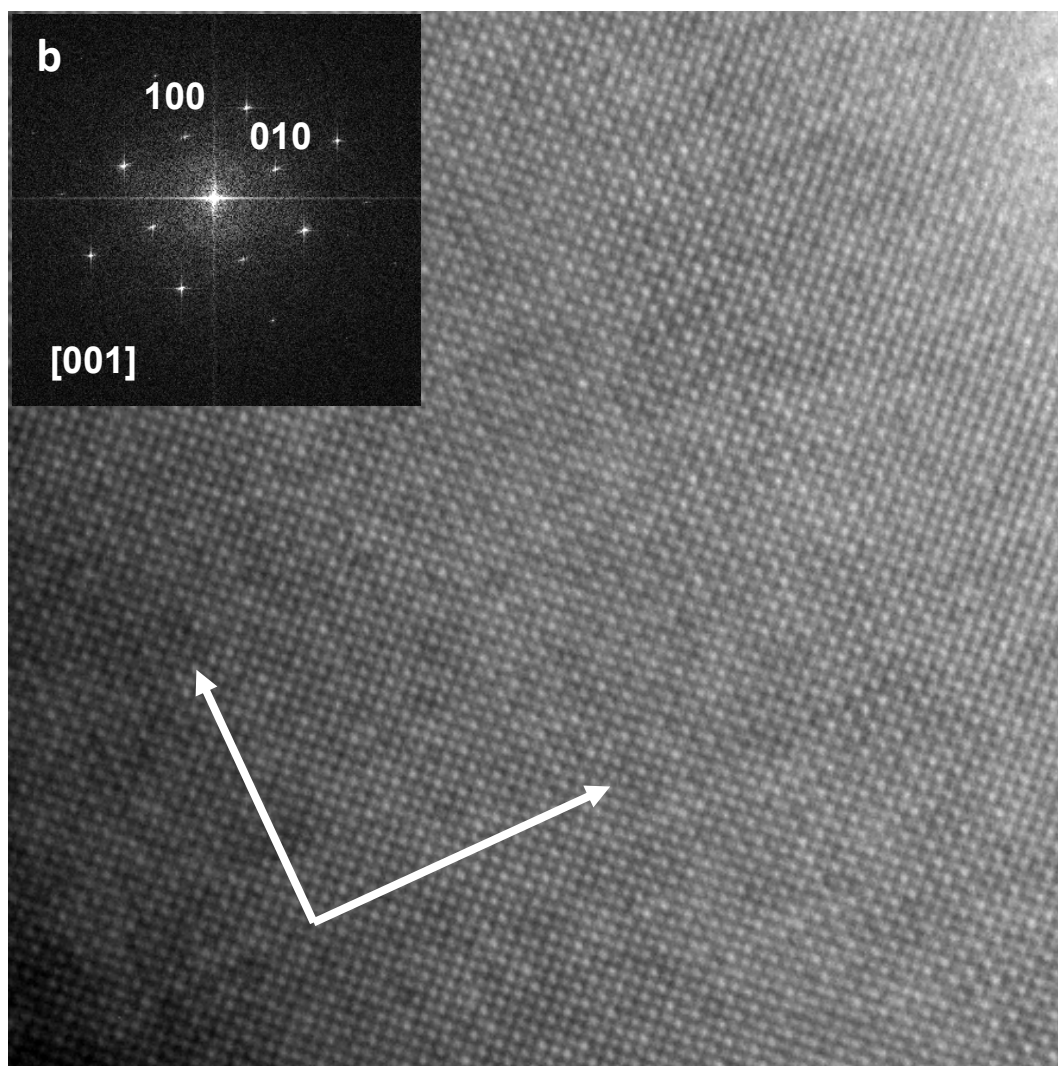

**Figure SI 9.** HREM image of  $\text{Sr}_2\text{CoNb}_{0.9}\text{Ti}_{0.1}\text{O}_6$  along [001]p. (a) Optical FT.

## SUPPLEMENTARY INFORMATION FOR

### Complex magnetic behaviour of $\text{Sr}_2\text{CoNb}_{1-x}\text{Ti}_x\text{O}_6$ ( $0 \leq x \leq 0.5$ ) as a result of a flexible microstructure

*M. Teresa Azcondo<sup>a,\*</sup>, Julio Romero de Paz<sup>b</sup>, Khalid Boulahya<sup>c</sup>, Clemens Ritter<sup>d</sup>, Flaviano García-Alvarado<sup>a</sup> and Ulises Amador<sup>a</sup>*

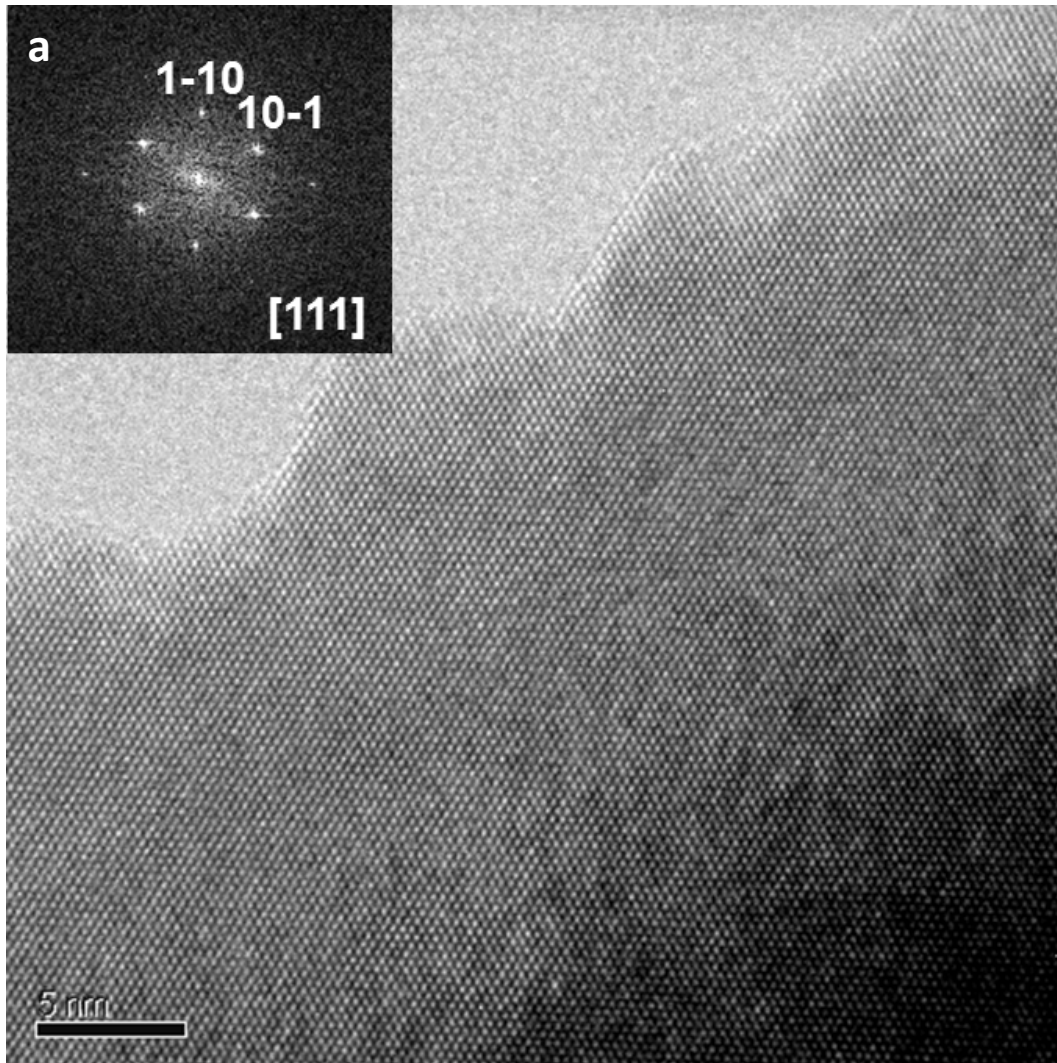

**Figure SI 10.** HREM image of  $\text{Sr}_2\text{CoNb}_{0.9}\text{Ti}_{0.1}\text{O}_6$  along  $[111]_p$ . (a) Optical FT.

As for the parent compound, HREM image along  $[-110]_p$  revealed the existence of two kind of domains (simple cubic disordered and B-ions ordered) which intergrowth in a disordered fashion. In Fig.SI 7 FFTs of adjacent domains of both types are presented.

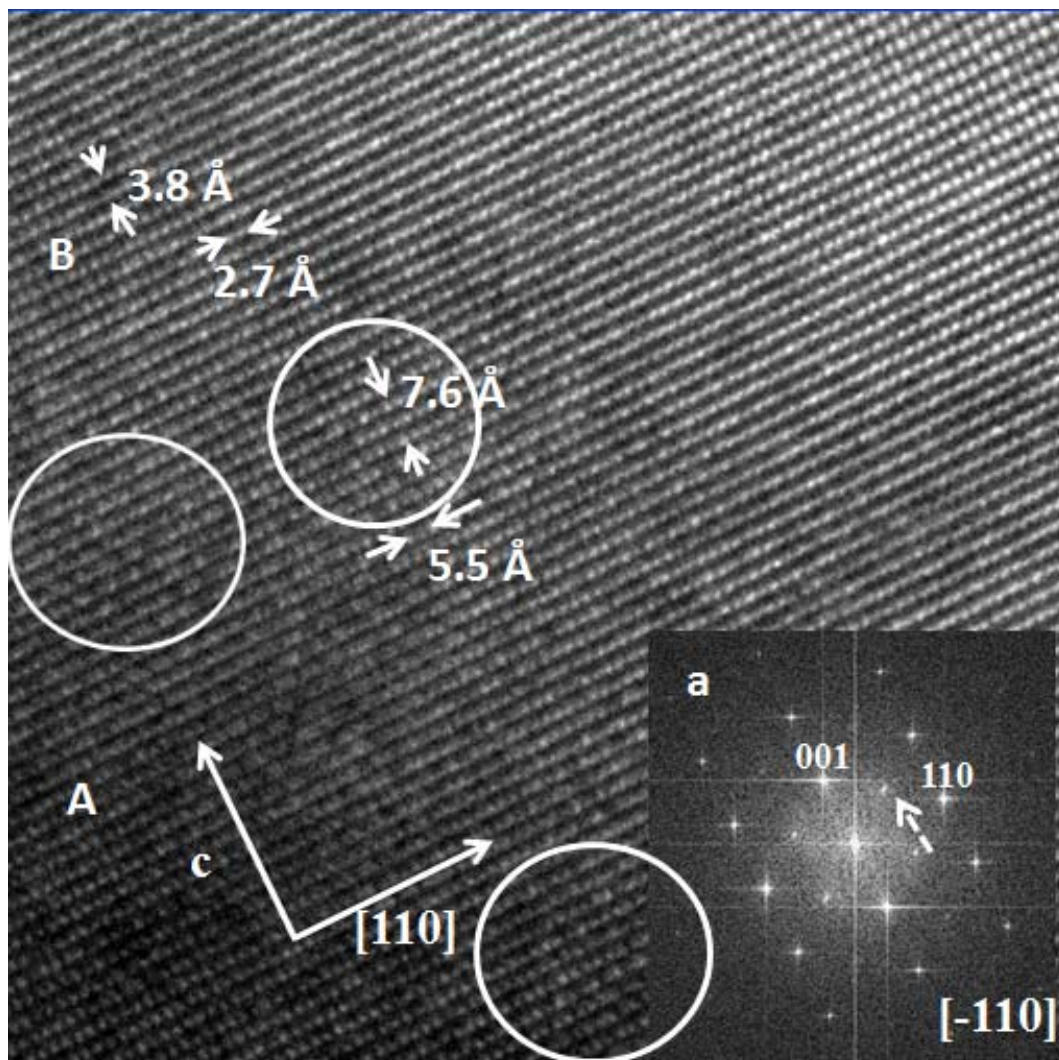

**Figure SI 11.** HREM image of  $\text{Sr}_2\text{CoNb}_{0.9}\text{Ti}_{0.1}\text{O}_6$  along  $[110]_p$ . (a) Optical FT.



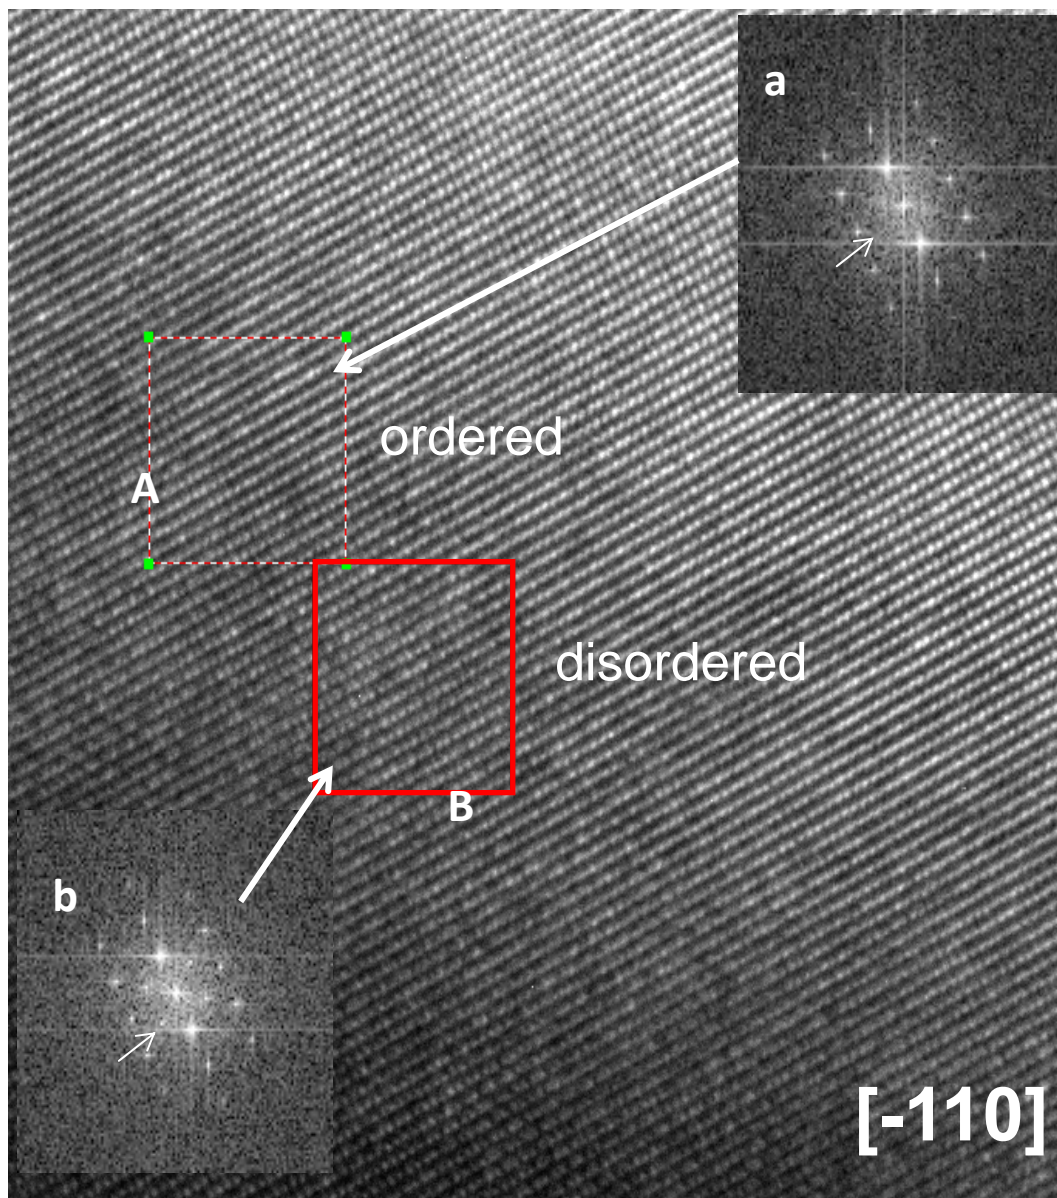

**Figure SI 12.** HREM image of  $\text{Sr}_2\text{CoNb}_{0.9}\text{Ti}_{0.1}\text{O}_6$  along  $[-110]$ p. (a) Optical FT corresponding to double-perovskite domains, the arrow indicates a superstructure spot, (b) Optical FT of a simple-cubic perovskite domain.

# SUPPLEMENTARY INFORMATION FOR

## Complex magnetic behaviour of $\text{Sr}_2\text{CoNb}_{1-x}\text{Ti}_x\text{O}_6$ ( $0 \leq x \leq 0.5$ ) as a result of a flexible microstructure

*M. Teresa Azcondo<sup>a,\*</sup>, Julio Romero de Paz<sup>b</sup>, Khalid Boulahya<sup>c</sup>, Clemens Ritter<sup>d</sup>, Flaviano García-Alvarado<sup>a</sup> and Ulises Amador<sup>a</sup>*

### HREM of $\text{Sr}_2\text{CoNb}_{1-x}\text{Ti}_x\text{O}_6$ with $x = 0.2$

HREM taken along different zone axes were obtained to fully reconstruct the reciprocal/real space. The most relevant reciprocal zone axes corresponding to [001], [111] and [110] are given as SI8, SI9 and SI10, respectively. As for the previous cases images along [001] and [111] zone axes show an apparently ordered material with d-spacing corresponding to a simple perovskite structure. FT (insets of Fig. SI8 and SI9) reveals that the whole crystals seem to be homogeneous and only maxima corresponding to the simple cubic perovskite are observed.

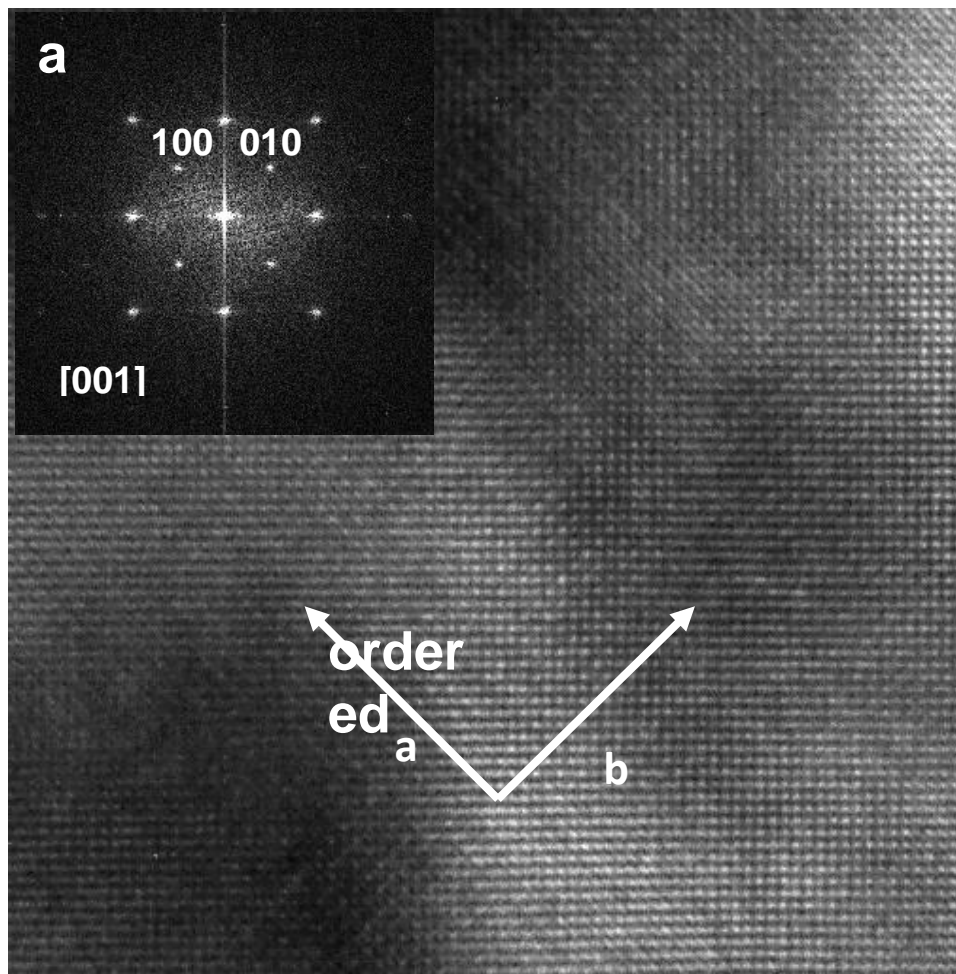

**Figure SI 13.** HREM image of  $\text{Sr}_2\text{CoNb}_{0.8}\text{Ti}_{0.2}\text{O}_6$  along [001]p. (a) Optical FT.

## SUPPLEMENTARY INFORMATION FOR

### Complex magnetic behaviour of $\text{Sr}_2\text{CoNb}_{1-x}\text{Ti}_x\text{O}_6$ ( $0 \leq x \leq 0.5$ ) as a result of a flexible microstructure

*M. Teresa Azcondo<sup>a,\*</sup>, Julio Romero de Paz<sup>b</sup>, Khalid Boulahya<sup>c</sup>, Clemens Ritter<sup>d</sup>, Flaviano García-Alvarado<sup>a</sup> and Ulises Amador<sup>a</sup>*

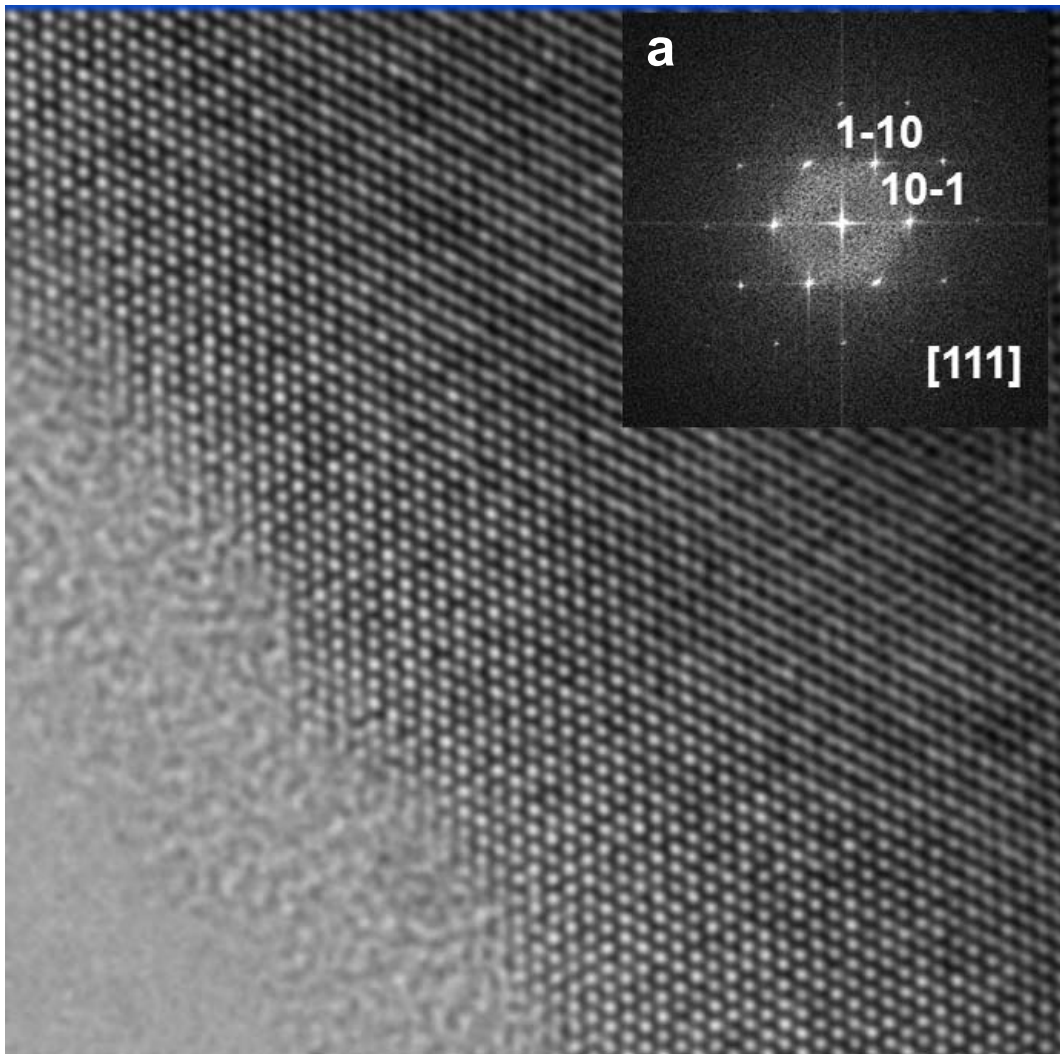

**Figure SI 14.** HREM image of  $\text{Sr}_2\text{CoNb}_{0.8}\text{Ti}_{0.2}\text{O}_6$  along  $[111]_p$ . (a) Optical FT.

HREM image along  $[110]_p$  (Fig. SI 10) evidences the existence of small domains of double-ordered perovskite (indicated as A) which intergrowths on a matrix of a simple-

cubic-disordered perovskite (indicated as B). The size and number of ordered domains decrease in comparison to materials with lower Ti-contents. FT of both types of domains (Fig. SI 11) confirm the ordered (A) and disordered (B) structures.

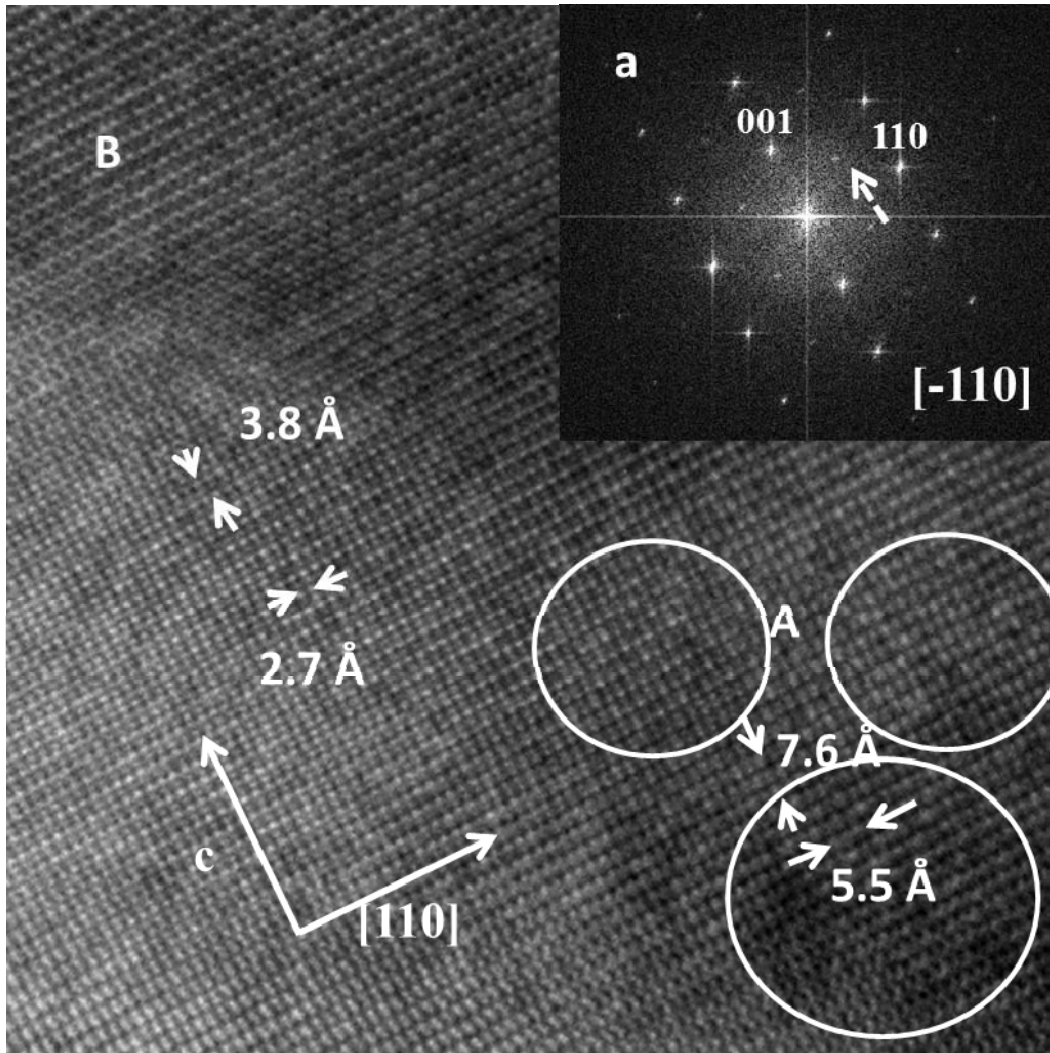

**Figure SI 15.** HREM image of  $\text{Sr}_2\text{CoNb}_{0.8}\text{Ti}_{0.2}\text{O}_6$  along  $[110]_p$ . (a) Optical FT corresponding to the superposition of ordered (A) where the arrow indicates a superstructure spot and disordered (B) domains.

## SUPPLEMENTARY INFORMATION FOR

### Complex magnetic behaviour of $\text{Sr}_2\text{CoNb}_{1-x}\text{Ti}_x\text{O}_6$ ( $0 \leq x \leq 0.5$ ) as a result of a flexible microstructure

*M. Teresa Azcondo<sup>a,\*</sup>, Julio Romero de Paz<sup>b</sup>, Khalid Boulahya<sup>c</sup>, Clemens Ritter<sup>d</sup>, Flaviano García-Alvarado<sup>a</sup> and Ulises Amador<sup>a</sup>*

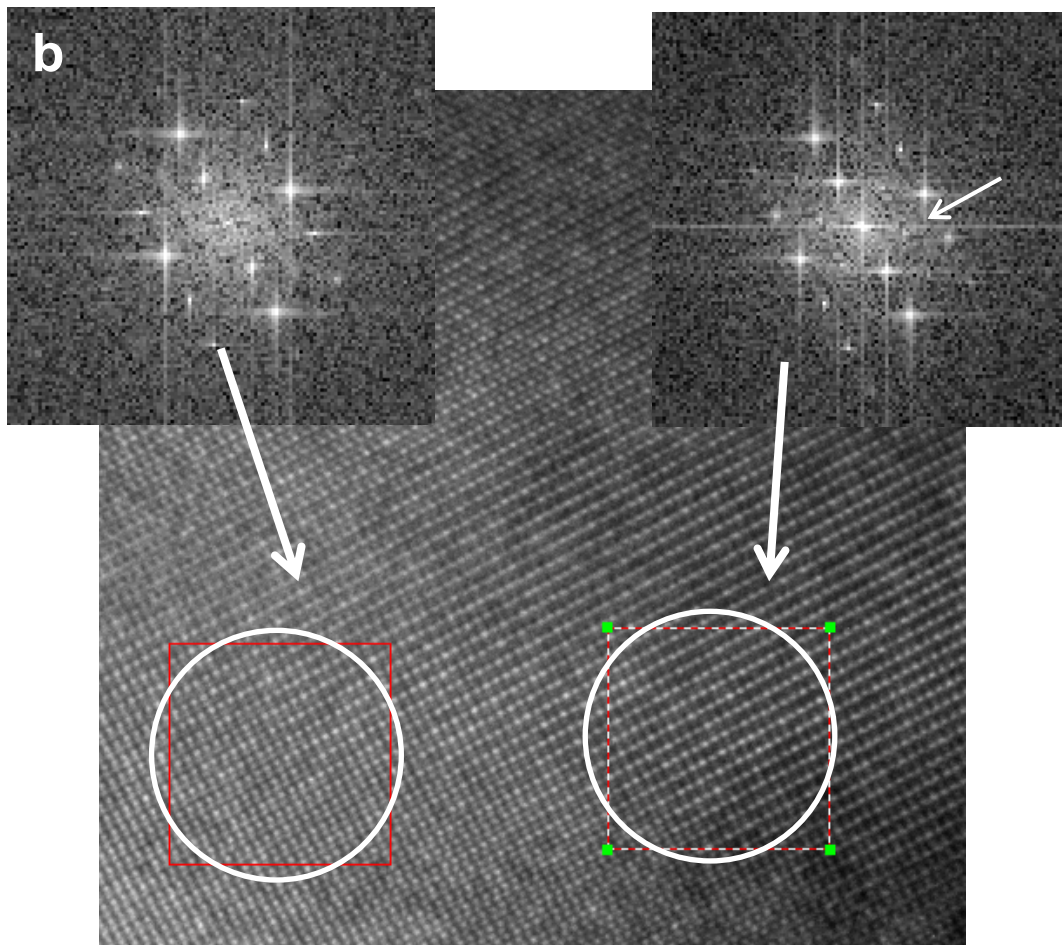

**Figure SI 16.** HREM image of  $\text{Sr}_2\text{CoNb}_{0.8}\text{Ti}_{0.2}\text{O}_6$  along  $[110]_p$ . (a) Optical FT corresponding to double-perovskite domains (A) where superstructure spot is indicated by an arrow, (b) Optical FT of a simple-cubic perovskite domains (B).

### HREM of $\text{Sr}_2\text{CoNb}_{1-x}\text{Ti}_x\text{O}_6$ with $x = 0.3$

For  $\text{Sr}_2\text{CoNb}_{0.7}\text{Ti}_{0.3}\text{O}_6$ , the electron microscopy study (Figs. SI 12 and SI 13) shows that some small domains of ordered perovskite structure (few unit cells areas) still remain along the simple-perovskite matrix.

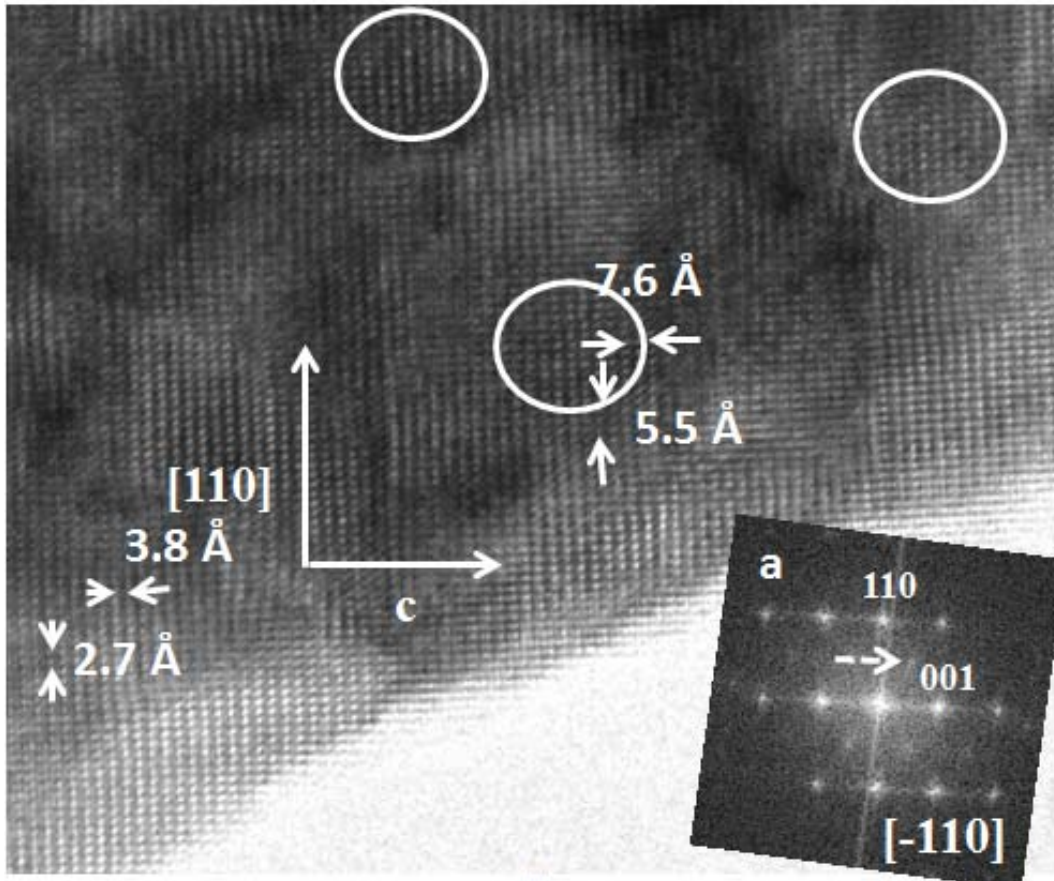

**Figure SI 17.** HREM image of  $\text{Sr}_2\text{CoNb}_{0.7}\text{Ti}_{0.3}\text{O}_6$  along  $[1-10]_p$ . (a) Optical FT, the arrow indicates a superstructure spot.

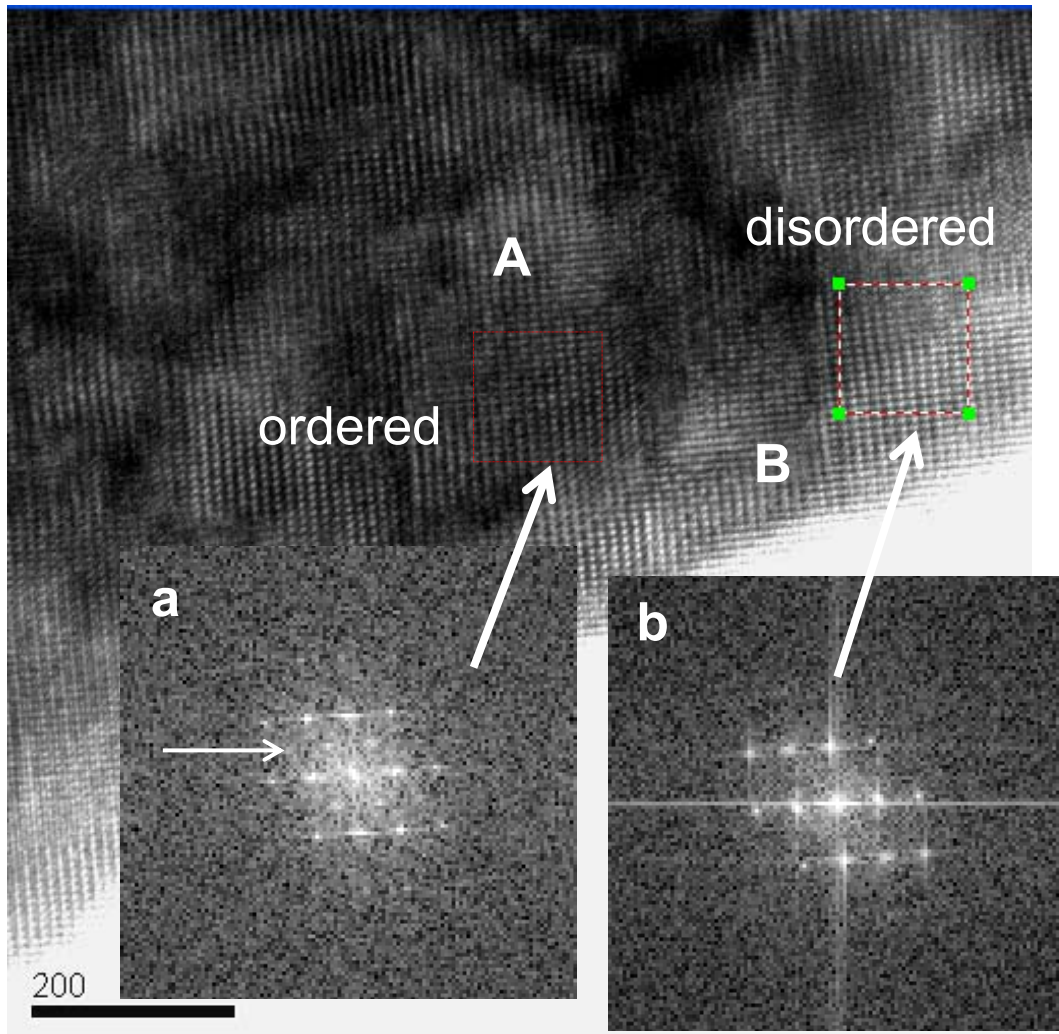

**Figure SI 18.** HREM image of  $\text{Sr}_2\text{CoNb}_{0.7}\text{Ti}_{0.3}\text{O}_6$  along  $[110]_p$ . (a) Optical FT corresponding to double-perovskite domains (A) the superstructure spot is indicated by an arrow, (b) Optical FT of a simple-cubic perovskite domains (B).

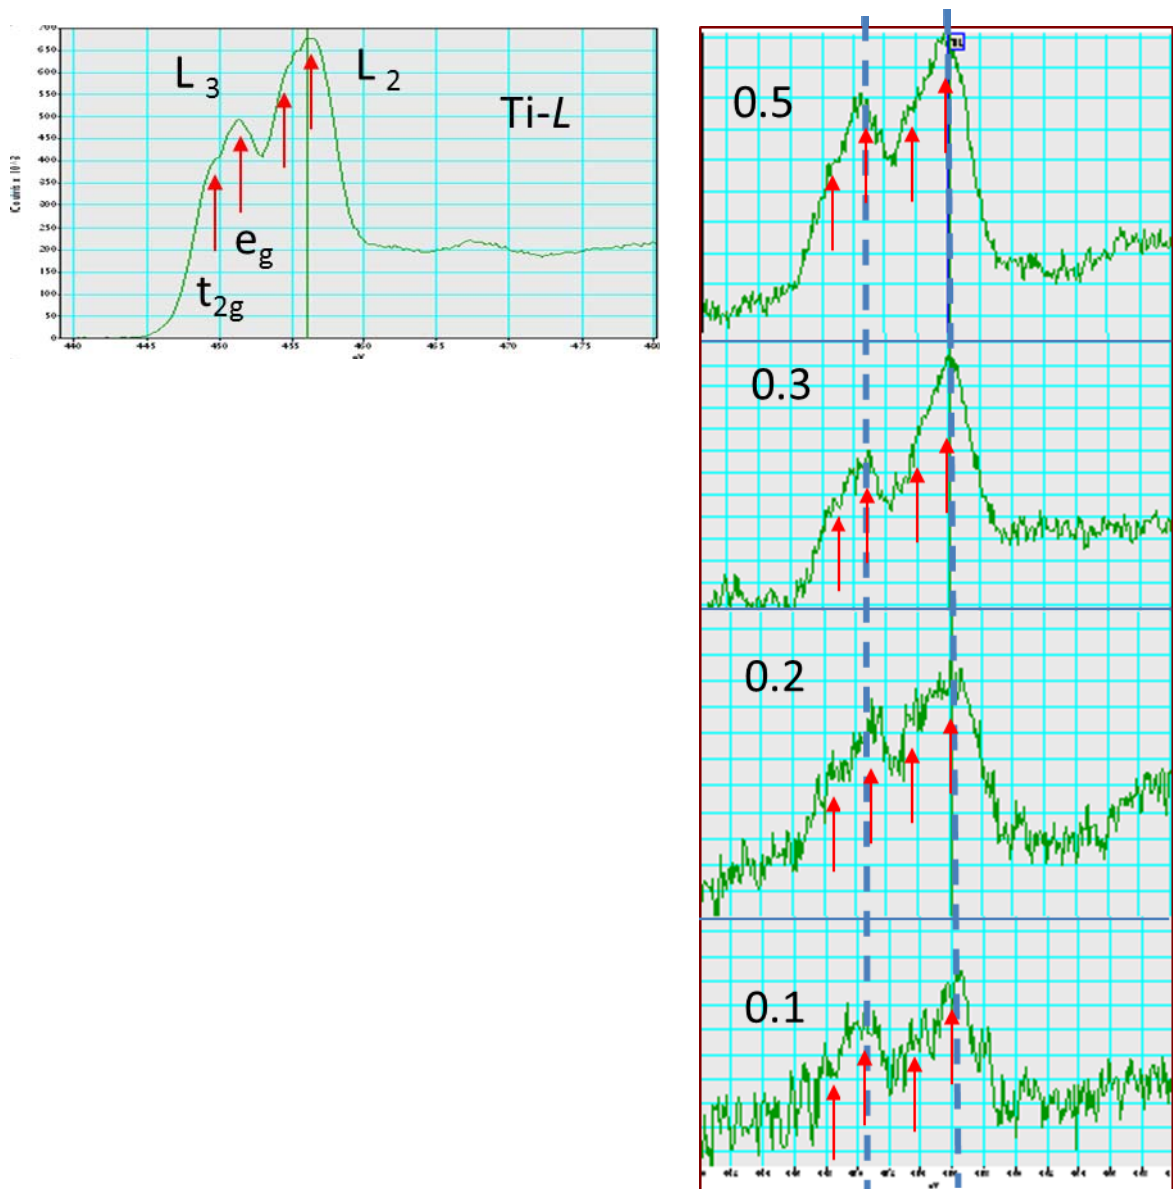

**Figure SI 19.** EELS spectra (right) of the Ti(L<sub>2</sub>,L<sub>3</sub>) edges for  $0.1 \leq x \leq 0.5$  of Sr<sub>2</sub>CoNb<sub>1-x</sub>Ti<sub>x</sub>O<sub>6</sub> compounds. The reference Ti<sup>4+</sup> spectrum (left) was acquired on rutile TiO<sub>2</sub> compound as internal standard.



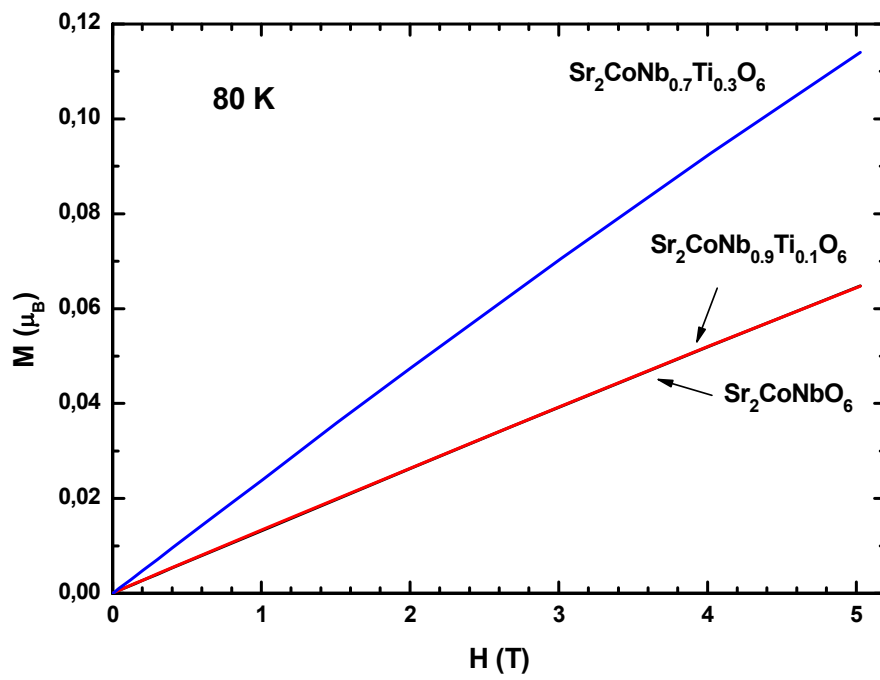

**Figure SI 20.:** Applied magnetic field dependence of magnetization at 80 K for  $\text{Sr}_2\text{CoNbO}_6$ ,  $\text{Sr}_2\text{CoNb}_{0.9}\text{Ti}_{0.1}\text{O}_6$  and  $\text{Sr}_2\text{CoNb}_{0.7}\text{Ti}_{0.3}\text{O}_6$  oxides.

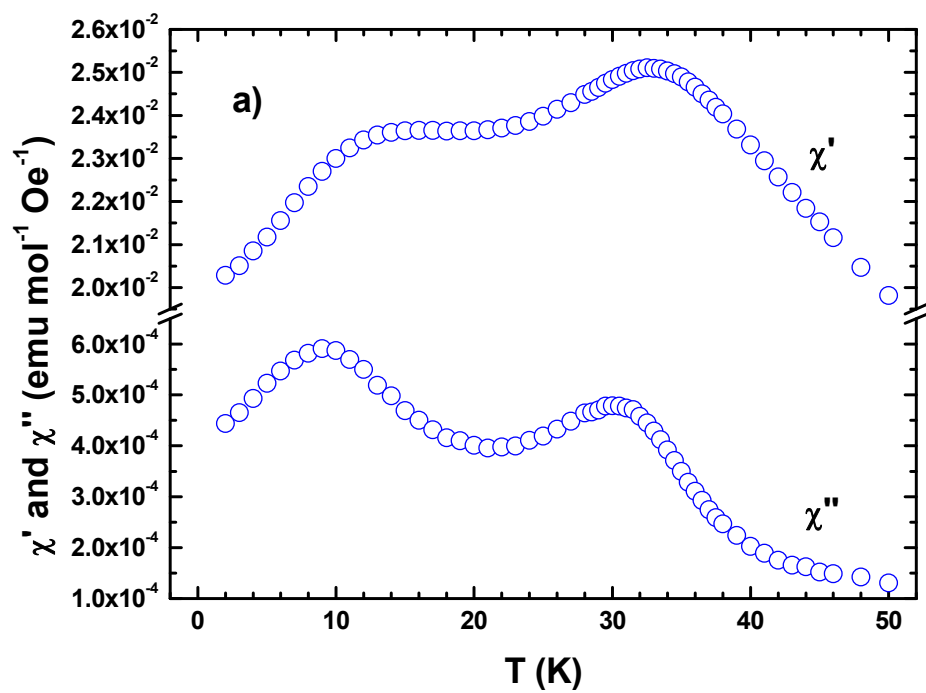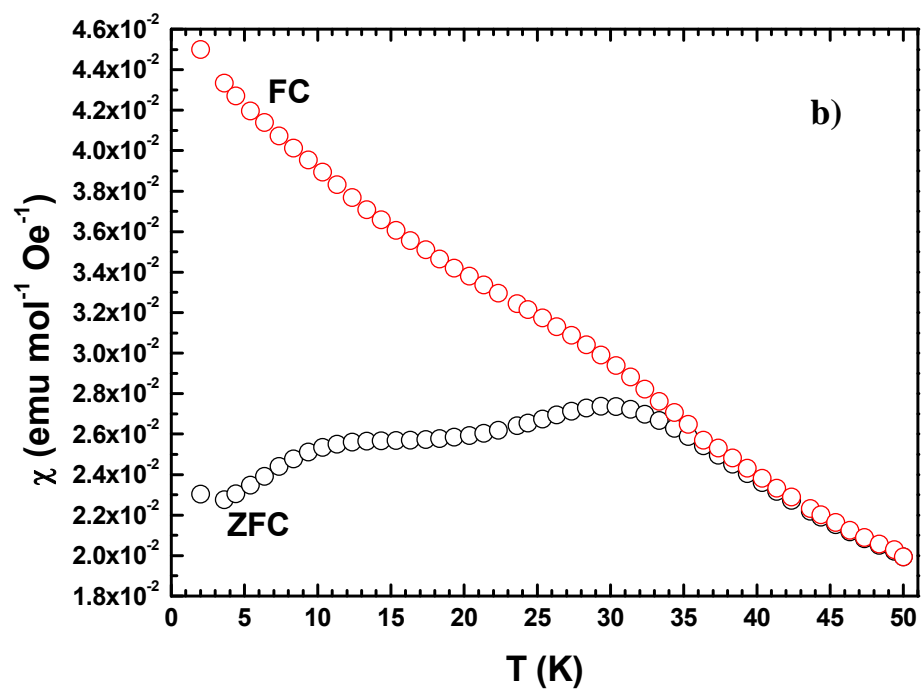

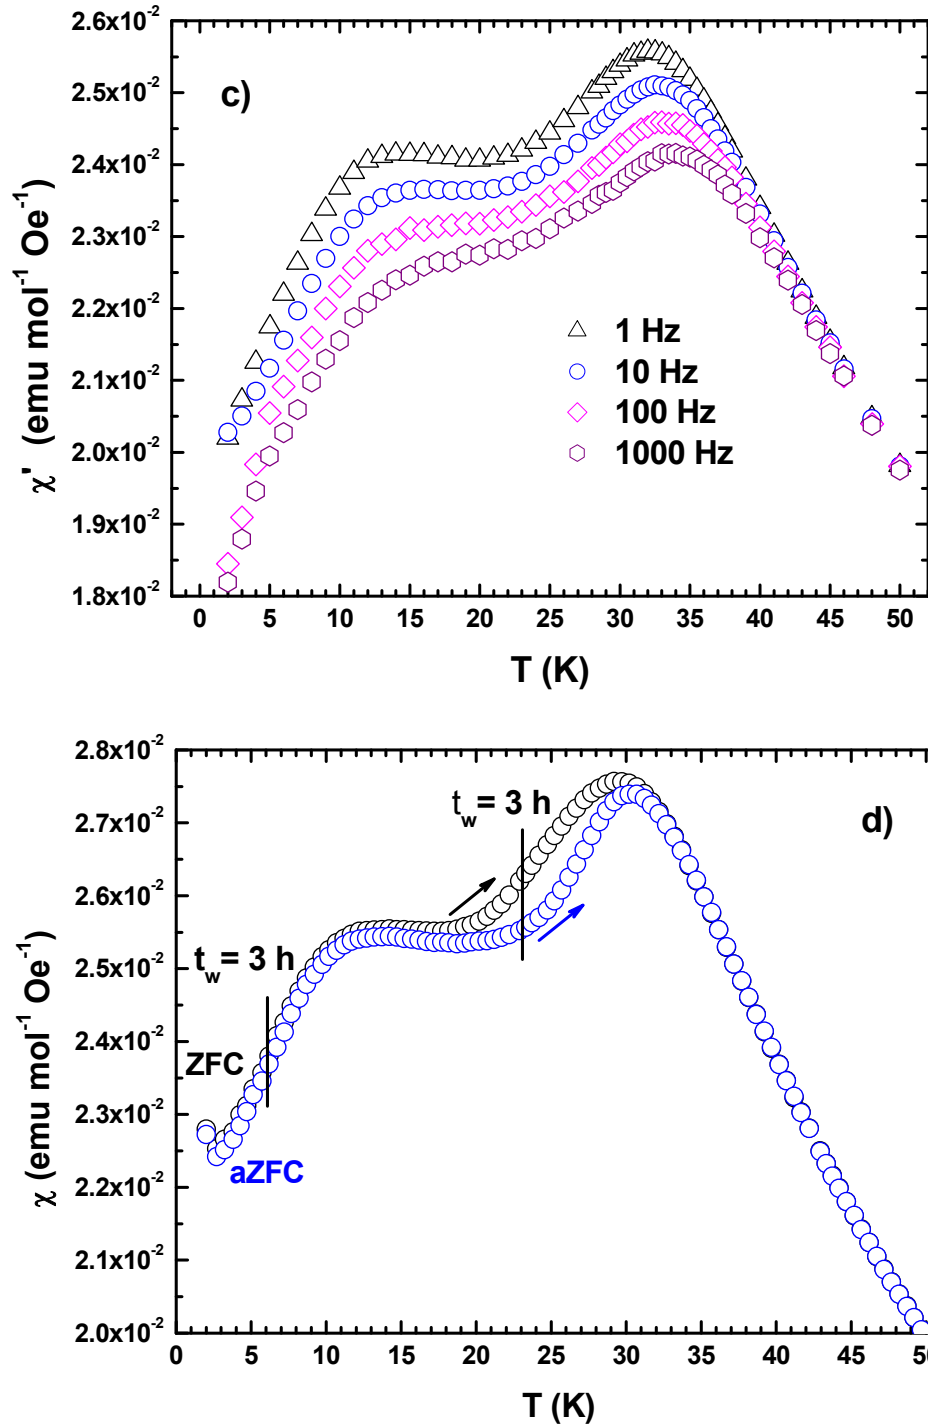

**Figure SI 21.** For  $\text{Sr}_2\text{CoNb}_{0.7}\text{Ti}_{0.3}\text{O}_6$  oxide: a) Temperature dependence of real and imaginary parts of ac- $\chi$  measured at a driving field of 0.35 mT and 10 Hz ( $H_{\text{dc}} = 0$  T). b) Temperature dependence of dc- $\chi$  measured in an applied magnetic field of 10 mT following the ZFC and FC protocols. c) Frequency dependence of  $\chi'$  measured at a driving field of 0.35 mT with frequencies 1, 10, 100 and 1000 Hz. d) Temperature dependence of aged  $\chi^{\text{ZFC}}$  (obtained waiting 3 hours at 23 and 6 K, consecutively) and not aged (normal)  $\chi^{\text{ZFC}}$  measured in an applied magnetic field of 5 mT.

**Table SI 1:** Structural parameters for  $\text{Sr}_2\text{CoNb}_{1-x}\text{Ti}_x\text{O}_6$  ( $x = 0.30, 0.50$ ) compounds obtained from NPD data.

|                              | <sup>b</sup> $\text{Sr}_2\text{CoNb}_{0.70}\text{Ti}_{0.30}\text{O}_6$ | <sup>c</sup> $\text{Sr}_2\text{CoNb}_{0.50}\text{Ti}_{0.50}\text{O}_6$ |
|------------------------------|------------------------------------------------------------------------|------------------------------------------------------------------------|
| <sup>a</sup> S.G. Pm-3m      |                                                                        |                                                                        |
| <b>a (Å)</b>                 | 3.90322(2)                                                             | 3.89620(2)                                                             |
| <b>Sr position</b>           | 1b                                                                     | 1b                                                                     |
| <b>Occ Sr</b>                | 2                                                                      | 2                                                                      |
| <b>U*100 (Å<sup>2</sup>)</b> | 0.70(2)                                                                | 0.76(2)                                                                |
| <b>B position</b>            | 1a                                                                     | 1a                                                                     |
| <b>Occ Co/Nb//Ti</b>         | 1/0.700(2)/0.289(2)                                                    | 1/0.499(2)/0.501(2)                                                    |
| <b>U*100 (Å<sup>2</sup>)</b> | 0.79(2)                                                                | 0.90(2)                                                                |
| <b>O(1) position</b>         | 3d                                                                     | 3d                                                                     |
| <b>Occ</b>                   | 6.003(2)                                                               | 5.942(2)                                                               |
| <b>U*100 (Å<sup>2</sup>)</b> | 0.95(3)                                                                | 1.01(3)                                                                |

<sup>a</sup> 1a (000), 1b ( $\frac{1}{2} \frac{1}{2} \frac{1}{2}$ ), 3d ( $\frac{1}{2} 0 0$ )

<sup>b</sup>  $\chi^2 = 3.66$ ,  $R_{\text{wp}} = 3.96\%$ ,  $R_{\text{exp}} = 2.07\%$ ,  $R_{\text{B}} = 1.09\%$ , Composition:  $\text{Sr}_2\text{CoNb}_{0.700(2)}\text{Ti}_{0.289(2)}\text{O}_{6.003(2)}$

<sup>c</sup>  $\chi^2 = 3.51$ ,  $R_{\text{wp}} = 3.90\%$ ,  $R_{\text{exp}} = 2.08\%$ ,  $R_{\text{B}} = 1.37\%$ , Composition:  $\text{Sr}_2\text{CoNb}_{0.499(2)}\text{Ti}_{0.501(2)}\text{O}_{5.942(2)}$
